# Supplementary material for: S1P/S1P2 Signaling Axis Regulates Both NLRP3 Upregulation and NLRP3 Inflammasome Activation in Macrophages Primed with Lipopolysaccharide
Source: MDPI journal article supplement (doi:10.3390/antiox10111706), 2021-10-27
Supplement: s1 [file s1]

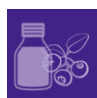

## Supplementary Material

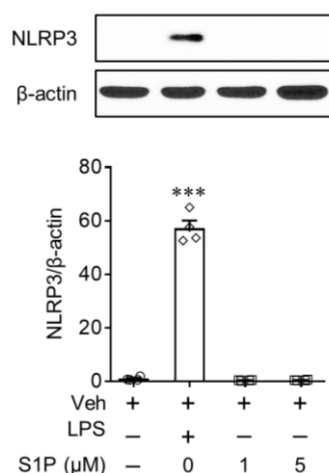

**Figure S1.** S1P itself does not affect NLRP3 upregulation in normal BMDMs. Cells were exposed to LPS (500 ng/mL, a positive control) or S1P (1 and 5 μM) for 24 h. Effects of S1P on NLRP3 expression in BMDMs were determined by Western blot analysis.  $n = 4$  per group. \*\*\*  $p < 0.001$  versus control BMDMs (Veh).

**Table S1.** Primer sets used for qPCR analysis in this study.

| Gene.                | Accession Number | Sequence                                                                                 |
|----------------------|------------------|------------------------------------------------------------------------------------------|
| S1P <sub>1</sub> (M) | NM_007901.5      | Forward: 5'-AGG GAA CTT TGC GAG TGA G-3'<br>Reverse: 5'-GTT ACA GCA AAG CCA GGT CAG-3'   |
| S1P <sub>2</sub> (M) | NM_010333.4      | Forward: 5'-ATA GAC CGA GCA CAG CCA AC-3'<br>Reverse: 5'-GTG TTC CAG AAC CTT CTC AGG-3'  |
| S1P <sub>3</sub> (M) | NM_010101.4      | Forward: 5'-TTG CAG AAC GAG AGC CTA TT-3'<br>Reverse: 5'-TTC CCG GAG AGT GTC ATT TC-3'   |
| S1P <sub>4</sub> (M) | NM_010102.2      | Forward: 5'-ACC TTC AGT CTG CTC TTC ACG-3'<br>Reverse: 5'-AAG AGC ACA TAG CCC TTG GAG-3' |
| S1P <sub>5</sub> (M) | NM_053190.2      | Forward: 5'-AGA TTT CCA ATA GCC GCT CTC-3'<br>Reverse: 5'-AGC TTG CCG GTG TAG TTG TAG-3' |
| β-actin (M)          | NM_007393.5      | Forward: 5'-AGC CTT CCT TCT TGG GTA TG-3'<br>Reverse: 5'-CTT CTG CAT CCT GTC AGC AA-3'   |
| GAPDH (M)            | NM_001289726.1   | Forward: 5'-TTG ATG GCA ACA ATC TCC AC-3'<br>Reverse: 5'-CGT CCC GTA GAC AAA ATG GT-3'   |
